# Supplementary material for: Identification of rare DNA variants in mitochondrial disorders with improved array-based sequencing
Source: PubMed Central journal article supplement — Nucleic Acids Res. 2010 Sep 15;39(1):44–58. doi: 10.1093/nar/gkq750 (PMC3017602; doi:10.1093/nar/gkq750), 2010-09-15
Supplement: supp_gkq750_NAR-WangWetal-SuppTable-8.pdf [file supp_gkq750_NAR-WangWetal-SuppTable-8.pdf]

**Supplementary Table 8. The quality score Q distribution for our custom resequencing array.** At a 0.67 threshold, 5.7% (5,973/104,753) of all positions on the resequencing array have at least one probe quartet presenting low performance and therefore will not provide reliable variant calls. SRMA called variant samples in 3% (185/5,973) of these positions, which were replaced with “N”

|                            | Q≤0.67 | Q>0.67 | Total   |
|----------------------------|--------|--------|---------|
| Called SNP positions       | 185    | 374    | 559     |
| Called reference positions | 5,788  | 98,221 | 104,009 |
| Total                      | 5,973  | 98,595 | 104,568 |
